# Supplementary material for: H2S protects against fatal myelosuppression by promoting the generation of megakaryocytes/platelets
Source: PubMed Central journal article supplement (PMC4766725; doi:10.1186/s13045-016-0244-7), 2016-02-24
Supplement: 13045_2016_244_MOESM1_ESM.pdf [file 13045_2016_244_MOESM1_ESM.pdf]

## Additional file 1

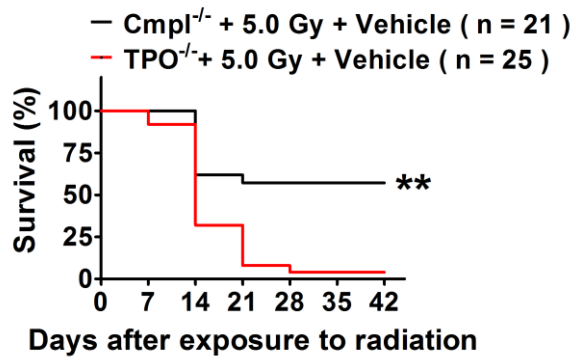

**Figure S1. Survival analysis of C-mpl<sup>-/-</sup> and TPO<sup>-/-</sup> mice after exposure to radiation and treated with vehicle. TPO<sup>-/-</sup> mice after exposure to 5.0 Gy <sup>137</sup>Cs then treated with vehicle had a significantly decreased survival compared with that in C-mpl<sup>-/-</sup> mice .\*\* $P < 0.01$ , log-rank test.**
