# Supplementary material for: H2S protects against fatal myelosuppression by promoting the generation of megakaryocytes/platelets
Source: PubMed Central journal article supplement (PMC4766725; doi:10.1186/s13045-016-0244-7), 2016-02-24
Supplement: 13045_2016_244_MOESM2_ESM.pdf [file 13045_2016_244_MOESM2_ESM.pdf]

## Additional file 2

a

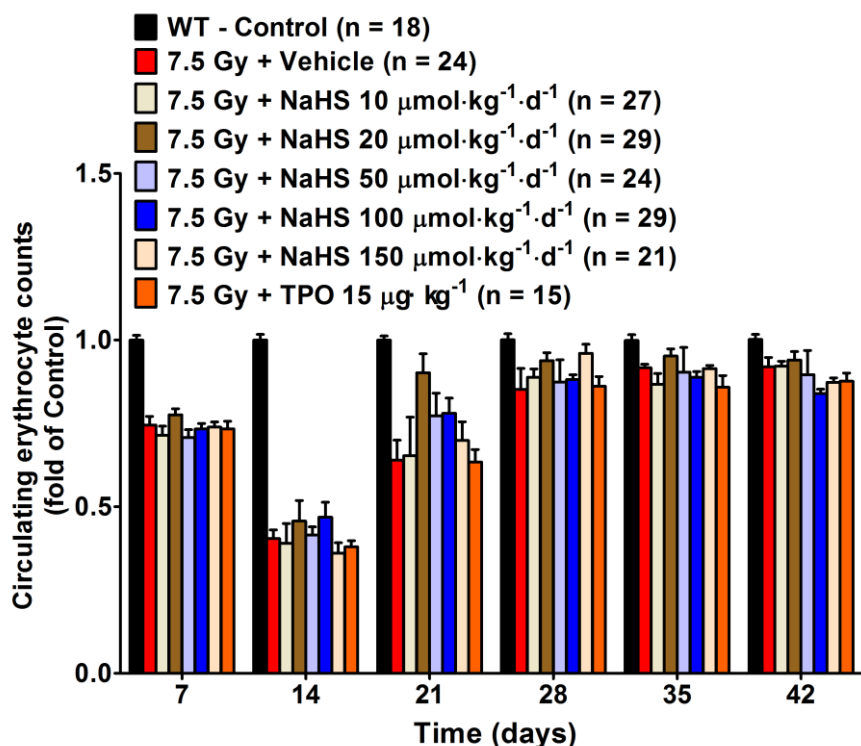

b

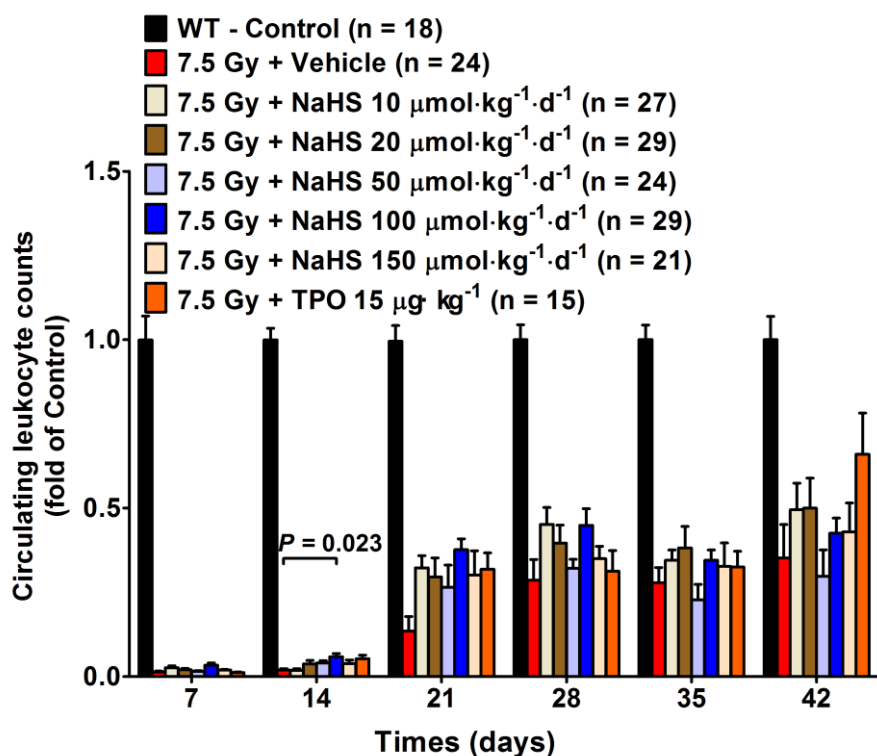

**Figure S2. H<sub>2</sub>S increases circulating leukocytes in WT mice exposed to radiation.** (a) NaHS treatment did not change circulating erythrocytes at dosages of 10, 20, 50, 100 and 150  $\mu\text{mol}\cdot\text{kg}^{-1}\cdot\text{d}^{-1}$  in WT mice exposed to radiation at day 7 and day 14. (b) NaHS treatment increased circulation leukocytes at a dosage of 100  $\mu\text{mol}\cdot\text{kg}^{-1}\cdot\text{d}^{-1}$  in WT mice exposed to radiation at day 14 but not day 7. Data in the graphs are means  $\pm$  SEM. *P* values less than 0.05 represent statistical significance.
